# Supplementary material for: Riboswitch structure: an internal residue mimicking the purine ligand
Source: PubMed Central journal article supplement — Nucleic Acids Res. 2009 Dec 18;38(6):2057–68. doi: 10.1093/nar/gkp1080 (PMC2847212; doi:10.1093/nar/gkp1080), 2009-12-18
Supplement: gkp1080_2.pdf [file gkp1080_2.pdf]

# **Riboswitch Structure: An Internal Residue Mimicking the Purine Ligand**

*Vanessa Delfosse, Patricia Bouchard, Eric Bonneau, Pierre Dagenais, Jean-François Lemay, Daniel A. Lafontaine and Pascale*

*Legault*

## **Supplementary Tables**

**Supplementary Table 1.** Resonance assignment of adenine H2 protons and G/U imino protons and nitrogens ( $\delta$  in ppm) for the wild-type and U65C mutant of the *B. subtilis pbuE* adenine aptamer.<sup>a</sup>

| Residue              | Wild-type - Adenine             |                                    |                                      | U65C mutant – No ligand         |                                    |                                      | U65C mutant – Guanine           |                                    |                                      |
|----------------------|---------------------------------|------------------------------------|--------------------------------------|---------------------------------|------------------------------------|--------------------------------------|---------------------------------|------------------------------------|--------------------------------------|
|                      | $\delta$ H2 Proton <sup>b</sup> | $\delta$ Imino Proton <sup>c</sup> | $\delta$ Imino Nitrogen <sup>c</sup> | $\delta$ H2 Proton <sup>b</sup> | $\delta$ Imino Proton <sup>c</sup> | $\delta$ Imino Nitrogen <sup>c</sup> | $\delta$ H2 Proton <sup>b</sup> | $\delta$ Imino Proton <sup>c</sup> | $\delta$ Imino Nitrogen <sup>c</sup> |
| G6                   |                                 | 12.99                              | 148.2                                |                                 | 13.00                              | 148.2                                |                                 | 12.98                              | 148.2                                |
| G8                   |                                 | 11.96                              | 145.7                                |                                 | 11.94                              | 145.7                                |                                 | 11.94                              | 145.7                                |
| A9                   | 7.34                            |                                    |                                      | 7.35                            |                                    |                                      | 7.37                            |                                    |                                      |
| G10                  |                                 | 13.33                              | 147.9                                |                                 | 13.31                              | 147.8                                |                                 | 13.32                              | 147.9                                |
| U11                  |                                 | 14.26                              | 162.0                                |                                 | 13.57                              | 161.1                                |                                 | 14.26                              | 162.2                                |
| A12                  | 7.24                            |                                    |                                      | 7.71                            |                                    |                                      | 7.41                            |                                    |                                      |
| U13                  |                                 | 13.17                              | 162.9                                |                                 | 13.79                              | 163.2                                |                                 | 13.56                              | 163.4                                |
| U18                  |                                 | 13.75                              | 162.4                                |                                 | 13.95                              | 162.6                                |                                 | 13.73                              | 162.3                                |
| A20                  | 7.56                            |                                    |                                      | 7.57                            |                                    |                                      | 7.54                            |                                    |                                      |
| A21                  | 7.84                            |                                    |                                      | 7.87                            |                                    |                                      | 7.85                            |                                    |                                      |
| U22/U30 <sup>d</sup> |                                 | 11.24                              | 158.4                                |                                 | 11.25                              | 158.4                                |                                 | 11.23                              | 158.4                                |
| U25                  |                                 | 13.88                              | 163.1                                |                                 | 13.88                              | 163.1                                |                                 | 13.84                              | 163.1                                |
| G28/G29 <sup>e</sup> |                                 | 13.48                              | 148.8                                |                                 | 13.46                              | 148.8                                |                                 | 13.45                              | 148.8                                |
| G29/G28 <sup>e</sup> |                                 | 13.43                              | 147.7                                |                                 | 13.43                              | 147.7                                |                                 | 13.40                              | 147.7                                |
| U30/U22 <sup>d</sup> |                                 | 10.35                              | 154.9                                |                                 | 10.32                              | 154.9                                |                                 | 10.31                              | 154.9                                |
| U31                  |                                 | 14.50                              | 163.3                                |                                 | 14.50                              | 163.2                                |                                 | 14.48                              | 163.2                                |
| U32                  |                                 | 12.93                              | 162.8                                |                                 | 12.91                              | 162.7                                |                                 | 12.91                              | 162.8                                |
| G33                  |                                 | 11.50                              | 145.6                                |                                 | 11.47                              | 145.6                                |                                 | 11.49                              | 145.6                                |
| A34                  | 7.33                            |                                    |                                      | 7.29                            |                                    |                                      | 7.34                            |                                    |                                      |
| G35                  |                                 | 12.74                              | 147.4                                |                                 | 12.64                              | 147.1                                |                                 | 12.73                              | 147.4                                |
| G36                  |                                 | 13.20                              | 148.3                                |                                 | 13.15                              | 148.1                                |                                 | 13.17                              | 148.3                                |

|     |      |              |       |      |                    |       |      |                    |       |
|-----|------|--------------|-------|------|--------------------|-------|------|--------------------|-------|
| G37 |      | 12.96        | 149.3 |      | 12.96              | 148.3 |      | 12.96              | 149.1 |
| U38 |      | 10.92        | 157.9 |      | Not detected       |       |      | 10.85              | 157.8 |
| G39 |      | Not detected |       |      | 12.65              | 148.5 |      | Not detected       |       |
| U40 |      | 10.65        | 159.8 |      | Not detected       |       |      | 10.63              | 159.7 |
| U42 |      | 13.62        | 163.3 |      | 9.72               | 156.7 |      | 13.85              | 163.1 |
| A43 | 7.19 |              |       | 7.90 |                    |       | 7.66 |                    |       |
| A46 | 7.02 |              |       | 7.07 |                    |       | 7.05 |                    |       |
| G47 |      | 12.89        | 146.6 |      | 12.92              | 146.7 |      | 12.86              | 146.6 |
| G48 |      | 12.40        | 146.7 |      | 12.40              | 146.8 |      | 12.38              | 146.7 |
| A49 | 7.48 |              |       | 7.49 |                    |       | 7.48 |                    |       |
| A56 |      |              |       |      |                    |       |      |                    |       |
| U59 |      | 13.76        | 163.6 |      | 13.75              | 163.6 |      | 13.72              | 163.5 |
| U62 |      | 13.93        | 161.7 |      | 13.90              | 161.7 |      | 13.88              | 161.7 |
| G63 |      | 11.57        | 147.3 |      | 11.59              | 147.2 |      | 11.58              | 147.2 |
| U65 |      | 14.15        | 162.6 |      | U65 mutated to a C |       |      | U65 mutated to a C |       |
| U66 |      | 14.09        | 163.2 |      | 12.67              | 160.5 |      | 14.45              | 163.2 |
| A67 | 7.95 |              |       | 7.11 |                    |       | 7.98 |                    |       |
| U69 |      | 13.98        | 162.3 |      | 13.96              | 162.3 |      | 13.96              | 162.3 |
| G71 |      | 12.96        | 147.5 |      | 12.95              | 147.5 |      | 12.94              | 147.5 |

- The wild-type adenine aptamer was prepared in the presence of adenine and the U65C mutant was prepared in the absence (no ligand) or the presence of guanine as described in Materials and Methods.
- Assignments of H2 protons were obtained from 3D  $^{15}\text{N}$ -edited NOESY-HSQC spectra collected at 15 °C. The error on these values is  $\pm 0.08$  ppm.
- Assignments of imino protons and nitrogens were obtained from the 2D  $^1\text{H}$ - $^{15}\text{N}$  HSQC spectra collected at 15 °C. For the adenine-bound wild-type aptamer and the ligand-free U65C mutant, the errors on the imino proton and nitrogen chemical shifts are  $\pm 0.01$  ppm and  $\pm 0.1$  ppm, respectively. For the guanine-bound U65C mutant, the errors on the imino proton and nitrogen chemical shifts are  $\pm 0.02$  ppm and  $\pm 0.1$  ppm, respectively.
- These signals are assigned to either U22 or U30.
- These signals are assigned to either G28 or G29.

**Supplementary Table 2.** List of NOEs involving imino protons in the wild-type and U65C mutant of the *B. subtilis* *pbuE* adenine aptamer.<sup>a</sup>

| Wild-type - Adenine |                 | U65C Mutant – No ligand |                 | U65C Mutant – Guanine |                 |
|---------------------|-----------------|-------------------------|-----------------|-----------------------|-----------------|
| Imino proton        | NOE             | Imino proton            |                 | Imino proton          | NOE             |
| G6 H1               | G6 H1 – G71 H1  | G6 H1                   | G6 H1 – G71 H1  | G6 H1                 | G6 H1 – G71 H1  |
| G8 H1               | G8 H1 – G71 H1  | G8 H1                   | G8 H1 – G71 H1  | G8 H1                 | G8 H1 – G71 H1  |
|                     | G8 H1 – U69 H3  |                         | G8 H1 – U69 H3  |                       | G8 H1 – U69 H3  |
|                     | G8 H1 – A9 H2   |                         | G8 H1 – A9 H2   |                       | G8 H1 – A9 H2   |
| G10 H1              | G10 H1 – U69 H3 | G10 H1                  | G10 H1 – U69 H3 | G10 H1                | G10 H1 – U69 H3 |
|                     | G10 H1 – U11 H3 |                         | G10 H1 – U11 H3 |                       | G10 H1 – U11 H3 |
|                     | G10 H1 – A9 H2  |                         | G10 H1 – A9 H2  |                       | G10 H1 – A9 H2  |
|                     | G10 H1 – A67 H2 |                         | G10 H1 – A67 H2 |                       | G10 H1 – A67 H2 |
| U11 H3              | U11 H3 – U66 H3 | U11 H3                  | U11 H3 – U66 H3 | U11 H3                | U11 H3 – U66 H3 |
|                     | U11 H3 – G10 H1 |                         | U11 H3 – G10 H1 |                       | U11 H3 – G10 H1 |
|                     | U11 H3 – U40 H3 |                         |                 |                       | U11 H3 – U40 H3 |
|                     | U11 H3 – A67 H2 |                         | U11 H3 – A67 H2 |                       | U11 H3 – A67 H2 |
|                     | U11 H3 – A12 H2 |                         | U11 H3 – A12 H2 |                       | U11 H3 – A12 H2 |
| U13 H3              | U13 H3 – G37 H1 | U13 H3                  | U13 H3 – G37 H1 | U13 H3                | U13 H3 – G37 H1 |
|                     | U13 H3 – U38 H3 |                         |                 |                       | U13 H3 – U38 H3 |
|                     | U13 H3 – U42 H3 |                         |                 |                       | U13 H3 – U42 H3 |
|                     | U13 H3 – A43 H2 |                         | U13 H3 – A43 H2 |                       | U13 H3 – A43 H2 |
| U18 H3              | U18 H3 – G33 H1 | U18 H3                  | U18 H3 – G33 H1 | U18 H3                | U18 H3 – G33 H1 |
|                     | U18 H3 – G35 H1 |                         | U18 H3 – G35 H1 |                       | U18 H3 – G35 H1 |
|                     | U18 H3 – A34 H2 |                         | U18 H3 – A34 H2 |                       | U18 H3 – A34 H2 |
| U22 H3              | U22 H3 – U30 H3 | U22 H3                  | U22 H3 – U30 H3 | U22 H3                | U22 H3 – U30 H3 |

|        |                 |        |                 |        |                 |
|--------|-----------------|--------|-----------------|--------|-----------------|
|        | U22 H3 – U31 H3 |        | U22 H3 – U31 H3 |        | U22 H3 – U31 H3 |
|        | U22 H3 – A21 H2 |        | U22 H3 – A21 H2 |        | U22 H3 – A21 H2 |
| U30 H3 | U30 H3 – U22 H3 | U30 H3 | U30 H3 – U22 H3 | U30 H3 | U30 H3 – U22 H3 |
|        | U30 H3 – U31 H3 |        | U30 H3 – U31 H3 |        | U30 H3 – U31 H3 |
|        | U30 H3 – A21 H2 |        | U30 H3 – A21 H2 |        | U30 H3 – A21 H2 |
| U31 H3 | U31 H3 – U30 H3 | U31 H3 | U31 H3 – U30 H3 | U31 H3 | U31 H3 – U30 H3 |
|        | U31 H3 – U22 H3 |        | U31 H3 – U22 H3 |        | U31 H3 – U22 H3 |
|        | U31 H3 – U32 H3 |        | U31 H3 – U32 H3 |        | U31 H3 – U32 H3 |
|        | U31 H3 – A20 H2 |        | U31 H3 – A20 H2 |        | U31 H3 – A20 H2 |
|        | U31 H3 – A21 H2 |        | U31 H3 – A21 H2 |        | U31 H3 – A21 H2 |
| U32 H3 | U32 H3 – G33 H1 | U32 H3 | U32 H3 – G33 H1 | U32 H3 | U32 H3 – G33 H1 |
|        | U32 H3 – U31 H3 |        | U32 H3 – U31 H3 |        | U32 H3 – U31 H3 |
|        | U32 H3 – A20 H2 |        | U32 H3 – A20 H2 |        | U32 H3 – A20 H2 |
|        | U32 H3 – A21 H2 |        | U32 H3 – A21 H2 |        | U32 H3 – A21 H2 |
| G33 H1 | G33 H1 – U18 H3 | G33 H1 | G33 H1 – U18 H3 | G33 H1 | G33 H1 – U18 H3 |
|        | G33 H1 – U32 H3 |        | G33 H1 – U32 H3 |        | G33 H1 – U32 H3 |
|        | G33 H1 – A20 H2 |        | G33 H1 – A20 H2 |        | G33 H1 – A20 H2 |
|        | G33 H1 – A34 H2 |        | G33 H1 – A34 H2 |        | G33 H1 – A34 H2 |
| G35 H1 | G35 H1 – G36 H1 | G35 H1 | G35 H1 – G36 H1 | G35 H1 | G35 H1 – G36 H1 |
|        | G35 H1 – U18 H3 |        | G35 H1 – U18 H3 |        | G35 H1 – U18 H3 |
|        | G35 H1 – A34 H2 |        | G35 H1 – A34 H2 |        | G35 H1 – A34 H2 |
| G36 H1 | G36 H1 – G35 H1 | G36 H1 | G36 H1 – G35 H1 | G36 H1 | G36 H1 – G35 H1 |
|        | G36 H1 – G37 H1 |        | G36 H1 – G37 H1 |        | G36 H1 – G37 H1 |
| G37 H1 | G37 H1 – U13 H3 | G37 H1 | G37 H1 – U13 H3 | G37 H1 | G37 H1 – U13 H3 |
|        | G37 H1 – G36 H1 |        | G37 H1 – G36 H1 |        | G37 H1 – G36 H1 |
|        | G37 H1 – U38 H3 |        | G37 H1 – U38 H3 |        | G37 H1 – U38 H3 |
|        | G37 H1 – A43 H2 |        | G37 H1 – A43 H2 |        | G37 H1 – A43 H2 |

|        |                              |        |                              |        |                              |
|--------|------------------------------|--------|------------------------------|--------|------------------------------|
| U38 H3 | U38 H3 – Ade H9              | U38 H3 | Imino proton<br>not detected | U38 H3 | U38 H3 – Gua H9              |
|        | U38 H3 – G37 H1              |        |                              |        | U38 H3 – G37 H1              |
|        | U38 H3 – U13 H3              |        |                              |        | U38 H3 – U13 H3              |
|        | U38 H3 – U42 H3              |        |                              |        | U38 H3 – U42 H3              |
|        | U38 H3 – A43 H2              |        |                              |        | U38 H3 – A43 H2              |
| G39 H1 | Imino proton<br>not detected | G39 H1 | G39 H1 – U42 H3              | G39 H1 | Imino proton<br>not detected |
|        |                              |        | G39 H1 – A12 H2              |        |                              |
| U40 H3 | U40 H3 – G10 H1              | U40 H3 | Imino proton<br>not detected | U40 H3 | U40 H3 – U11 H3              |
|        | U40 H3 – U11 H3              |        |                              |        | U40 H3 – A67 H2              |
|        | U40 H3 – A67 H2              |        |                              |        |                              |
| U42 H3 | U42 H3 – Ade H9              | U42 H3 | U42 H3 – G39 H1              | U42 H3 | U42 H3 – Gua H1              |
|        | U42 H3 – Ade H2              |        |                              |        | U42 H3 – Gua H9              |
|        | U42 H3 – U38 H3              |        |                              |        | U42 H3 – U38 H3              |
|        | U42 H3 – U65 H3              |        |                              |        |                              |
|        | U42 H3 – U13 H3              |        | U42 H3 – A43 H2              |        |                              |
|        | U42 H3 – A43 H2              |        | U42 H3 – U13 H3              |        |                              |
| G47 H1 | G47 H1 – G48 H1              | G47 H1 | G47 H1 – G48 H1              | G47 H1 | G47 H1 – G48 H1              |
|        | G47 H1 – U62 H3              |        | G47 H1 – U62 H3              |        | G47 H1 – U62 H3              |
|        | G47 H1 – A46 H2              |        | G47 H1 – A46 H2              |        | G47 H1 – A46 H2              |
| G48 H1 | G48 H1 – G47 H1              | G48 H1 | G48 H1 – G47 H1              | G48 H1 | G48 H1 – G47 H1              |
|        | G48 H1 – U59 H3              |        | G48 H1 – U59 H3              |        |                              |
|        | G48 H1 – A49 H2              |        | G48 H1 – A49 H2              |        | G48 H1 – A49 H2              |
| U59 H3 | U59 H3 – A49 H2              | U59 H3 | U59 H3 – A49 H2              | U59 H3 |                              |
| U62 H3 | U62 H3 – G63 H1              | U62 H3 | U62 H3 – G63 H1              | U62 H3 | U62 H3 – G63 H1              |
|        | U62 H3 – G47 H1              |        | U62 H3 – G47 H1              |        | U62 H3 – G47 H1              |
|        | U62 H3 – A46 H2              |        | U62 H3 – A46 H2              |        | U62 H3 – A46 H2              |
| G63 H1 | G63 H1 – U62 H3              | G63 H1 | G63 H1 – U62 H3              | G63 H1 |                              |

|        |                 |     |                 |        |                 |
|--------|-----------------|-----|-----------------|--------|-----------------|
|        | G63 H1 – A46 H2 |     | G63 H1 – A46 H2 |        | G63 H1 – A46 H2 |
| U65 H3 | U65 H3 – Ade H2 | C65 | No imino proton | C65    | No imino proton |
|        | U65 H3 – U42 H3 |     |                 |        |                 |
| U66 H3 | U66 H3 – Ade H2 |     |                 | U66 H3 | U66 H3 – Gua H1 |
|        | U66 H3 – U11 H3 |     | U66 H3 – U11 H3 |        | U66 H3 – U11 H3 |
|        | U66 H3 – U65 H3 |     |                 |        |                 |
|        | U66 H3 – A12 H2 |     | U66 H3 – A12 H2 |        | U66 H3 – A12 H2 |
|        | U66 H3 – A67 H2 |     | U66 H3 – A67 H2 |        | U66 H3 – A67 H2 |
| U69 H3 | U69 H3 – G10 H1 |     | U69 H3 – G10 H1 | U69 H3 | U69 H3 – G10 H1 |
|        | U69 H3 – G8 H1  |     | U69 H3 – G8 H1  |        | U69 H3 – G8 H1  |
|        | U69 H3 – A9 H2  |     | U69 H3 – A9 H2  |        | U69 H3 – A9 H2  |
| G71 H1 | G71 H1 – G8 H1  |     | G71 H1 – G8 H1  | G71 H1 | G71 H1 – G8 H1  |

a. NOEs were obtained from 3D <sup>15</sup>N-edited NOESY-HSQC spectra collected at 15 °C. Only NOEs involving two imino protons, an adenine H2 and an imino proton, and the purine ligand H9 and an imino proton were analyzed. The wild-type adenine aptamer was prepared in the presence of adenine and the U65C mutant was prepared in the absence (no ligand) or the presence of guanine as described in Materials and Methods.
